# Supplementary material for: Enhanced flame-retardancy and controlled physical properties of flexible polyurethane foams based on a shear-responsive internal network
Source: Royal Society of Chemistry journal article supplement (doi:10.1039/c7ra07083g), 2017-01-01
Supplement: c7ra07083g1.pdf [file c7ra07083g1.pdf]

**Enhanced flame-retardancy and controlled physical properties of flexible polyurethane  
foams based on shear-responsive internal network**

Jingyi Rao\*, María P. Fernández-Ronco, Michel Vong, Sabyasachi Gaan

Laboratory of Advanced Fibers, Department Materials meet Life, Swiss Federal Laboratories  
for Materials Science and Technology, Lerchenfeldstrasse 5, 9014, St. Gallen, Switzerland

\*E-Mail: [jingyirao@gmail.com](mailto:jingyirao@gmail.com)

**Supporting Information:**

|                                                          |    |
|----------------------------------------------------------|----|
| The formulation of FPUFs.....                            | S2 |
| Optical microscopic images of FR-polyol suspensions..... | S2 |
| Rheological behavior of FR-polyol suspensions .....      | S3 |
| SEM images of FPUFs.....                                 | S3 |

| FPUFs | Formulation |               |            |              |                     |                    |                  |
|-------|-------------|---------------|------------|--------------|---------------------|--------------------|------------------|
|       | FR<br>[g]   | Polyol<br>[g] | TDI<br>[g] | Water<br>[g] | Tegoamin ZE1<br>[g] | STABI AKTIV<br>[g] | KOSMOS EF<br>[g] |
| Blank | --          |               |            |              |                     |                    |                  |
| 5.0%  | 5.0         | 100.00        | 26.20      | 1.60         | 0.40                | 0.50               | 0.45             |
| 6.0%  | 6.0         |               |            |              |                     |                    |                  |
| 7.5%  | 7.5         |               |            |              |                     |                    |                  |

**Table S1.** The formulation of FPUFs.

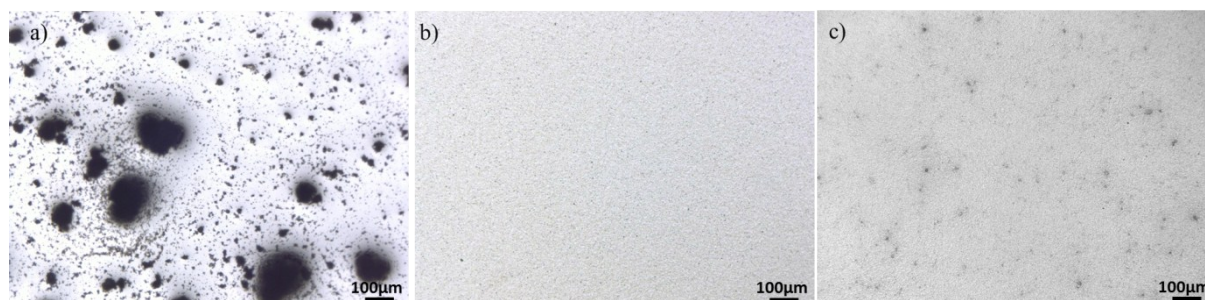

**Fig. S1.** Optical microscopic images of FR-polyol suspensions: N-6% (a), W-6% (b), and W\*-6% (c).

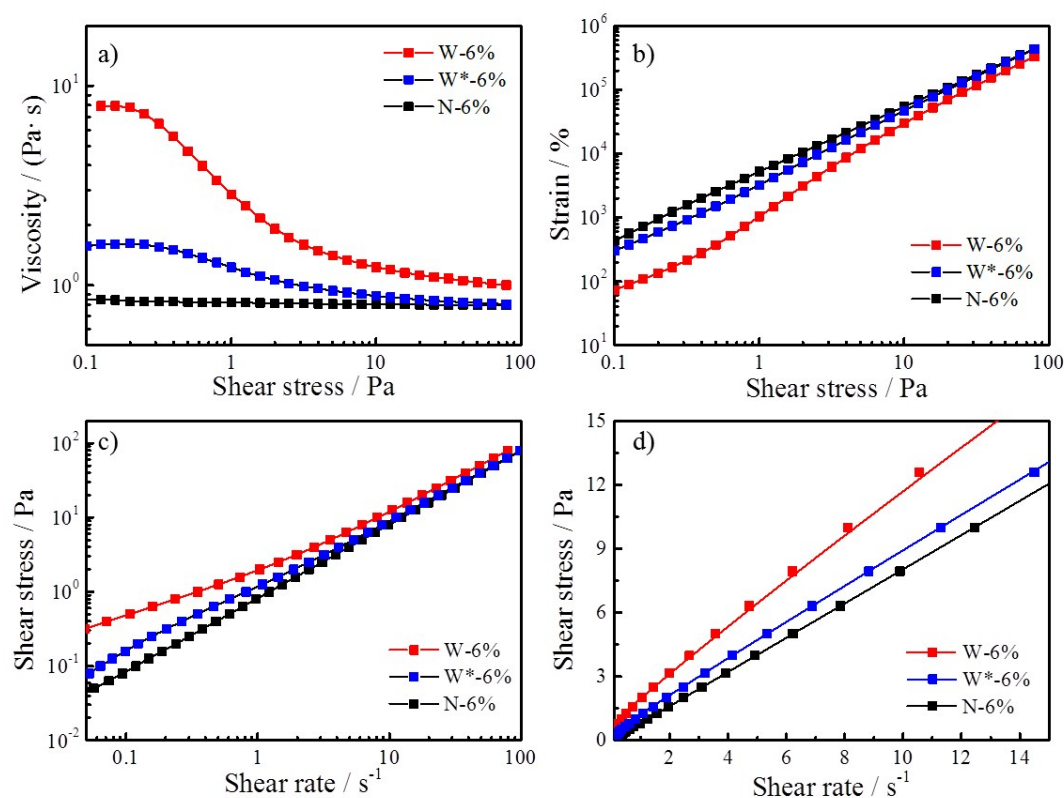

**Fig. S2.** Rheological behavior of FR-polyol suspensions, reporting the evolution of viscosity as a function of shear stress (a), strain versus shear stress (b), logarithmic plot of shear stress as a function of shear rate (c), and linear plot of shear stress versus shear rate (d), where symbols refer to experimental values and lines to theoretical calculations using the Herschel-Bulkley fitting model.

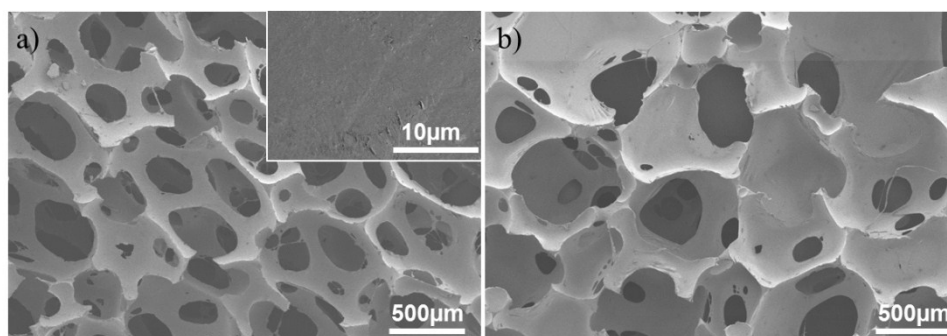

**Fig. S3.** SEM images of blank FPUF (a) and the W-6% FPUF without pre-stirring step (b).
